# Supplementary material
Source: MDPI journal article supplement (https://www.mdpi.com/2073-4395/13/10/2598)
Supplement: s1 [file s1]

Landscape and Micronutrient Fertilizer Effect on Agro-Fortified Wheat and Teff

Grain Nutrient Concentration in Western Amhara

Supplementary Files

Wheat Zn

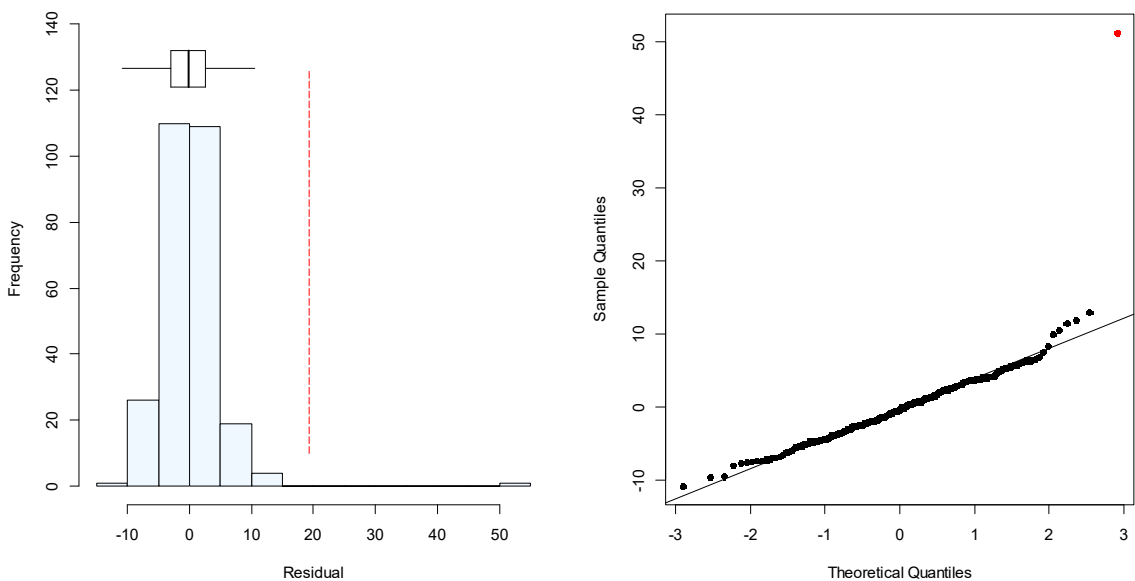

Figure S1. Wheat-Zn summary statistics for the residuals from the initial fit.

| Mean  | Median | Q1    | Q3   | Var   | SD   | Skew | Octile skewness | Kurtosis | No. outliers |
|-------|--------|-------|------|-------|------|------|-----------------|----------|--------------|
| 0.000 | -0.18  | -2.97 | 2.60 | 25.60 | 5.06 | 3.90 | -0.02           | 37.27    | 1            |

The residuals look plausibly normally distributed, although with one large outlier. Re-examining the raw data shows one outlying Zn value approximately twice the second-largest value in the set. Because such an observation could skew statistics (see, for example, the large skewness coefficient), the outlier was removed before further analyses.

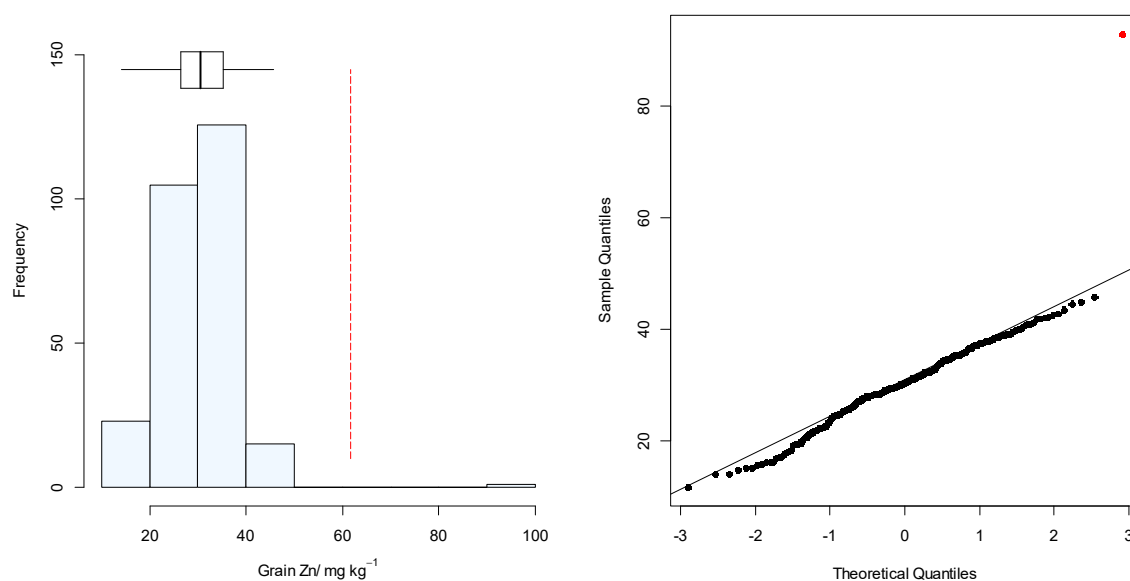

**Figure S2.** Wheat-Zn summary statistics for the residuals after removal of an outlier.

Removing just the outlier alone caused convergence problems (this is probably because of the fact that each farm is a single replicate), and so the whole field including the outlying value was removed to avoid this. The summary statistics and plot for the edited data set are below

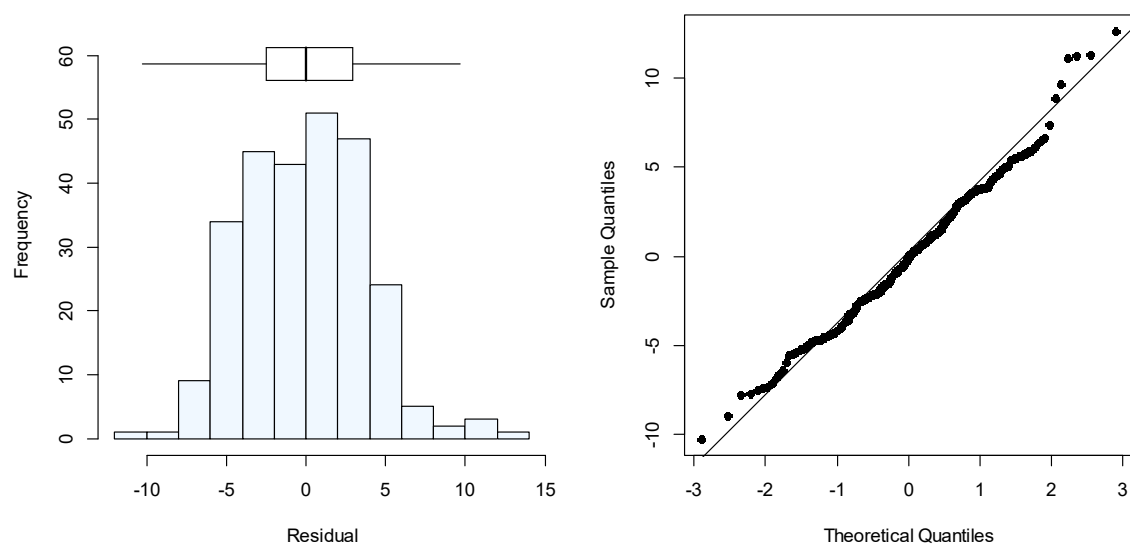

**Figure S3.** Wheat-Zn summary statistics for the residuals after removal of the whole field data set with the outlier.

| Mean  | Median | Q1    | Q3   | Var   | SD   | Skew | Octile | skewness | Kurtosis | No. outliers |
|-------|--------|-------|------|-------|------|------|--------|----------|----------|--------------|
| 0.000 | 0.01   | -2.48 | 2.92 | 14.77 | 3.84 | 0.28 | -0.03  |          | 0.19     | 0            |

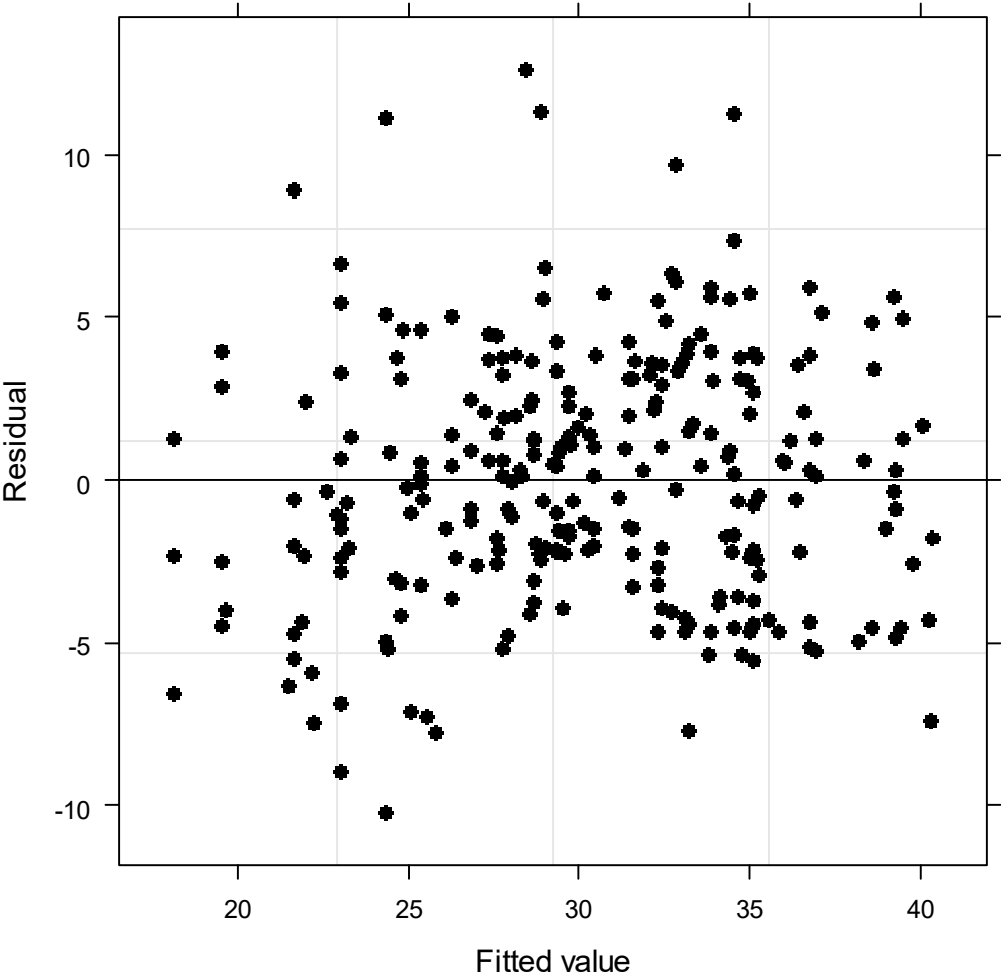

**Figure S4.** Plot of residuals against fitted values for Zn in wheat.

## Analysis of variance

### *Variance component estimates*

(NB the year and site components are based on two levels only)

| Groups           | Variance |
|------------------|----------|
| Farmer.Site:Site | 4.568    |
| Site             | 18.063   |
| Year             | 1.927    |
| Residual         | 17.544   |

**Table S1.** ANOVA Table for Zn in wheat.

|                   | Sum Sq  | Mean Sq | NumDF | DenDF   | F value  | Pr(>F)    |
|-------------------|---------|---------|-------|---------|----------|-----------|
| Landscape.unit    | 133.02  | 66.51   | 2     | 53.046  | 3.7909   | 0.02892   |
| C1                | 2021.40 | 2021.40 | 1     | 241.442 | 115.2161 | < 2.2e-16 |
| C2                | 365.89  | 365.89  | 1     | 249.031 | 20.8551  | 7.794e-06 |
| C3                | 0.12    | 0.12    | 1     | 242.925 | 0.0068   | 0.93438   |
| C4                | 56.90   | 56.90   | 1     | 246.165 | 3.2435   | 0.07293   |
| Landscape.unit:C1 | 51.15   | 25.58   | 2     | 240.181 | 1.4578   | 0.23481   |
| Landscape.unit:C2 | 74.49   | 37.24   | 2     | 241.596 | 2.1228   | 0.12192   |
| Landscape.unit:C3 | 8.22    | 4.11    | 2     | 241.755 | 0.2343   | 0.79134   |
| Landscape.unit:C4 | 34.09   | 17.04   | 2     | 242.931 | 0.9714   | 0.38000   |

Teff Zn

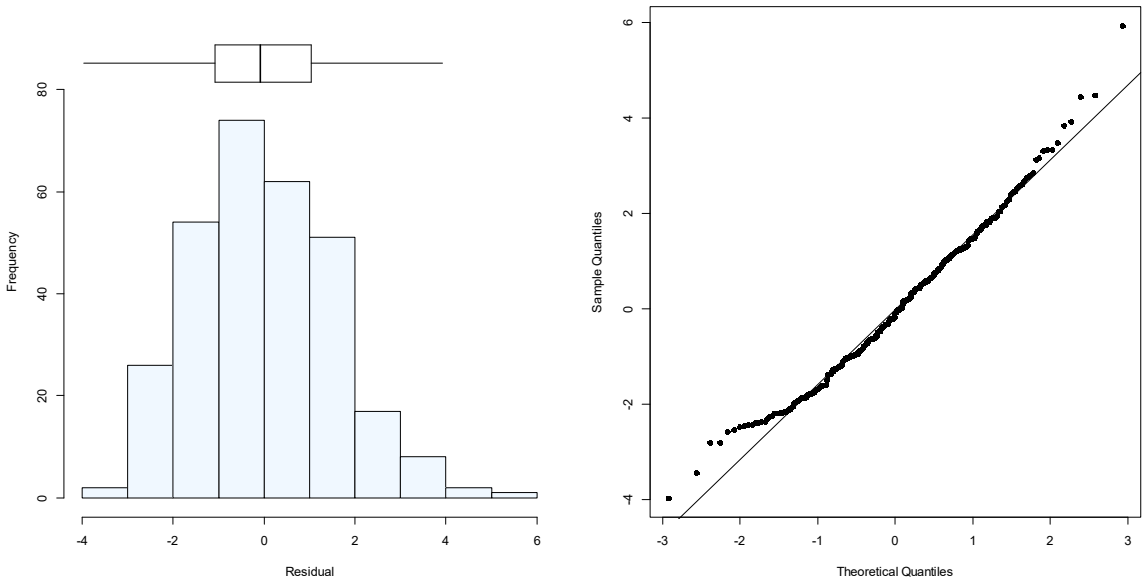

Figure S5. Teff-Zn summary statistics for the residuals from the initial fit.

| Mean  | Median | Q1    | Q3   | Var  | SD   | Skew | Octile | skewness | Kurtosis | No. outliers |
|-------|--------|-------|------|------|------|------|--------|----------|----------|--------------|
| 0.000 | -0.08  | -1.08 | 1.04 | 2.43 | 1.56 | 0.44 | 0.03   |          | 0.23     | 0            |

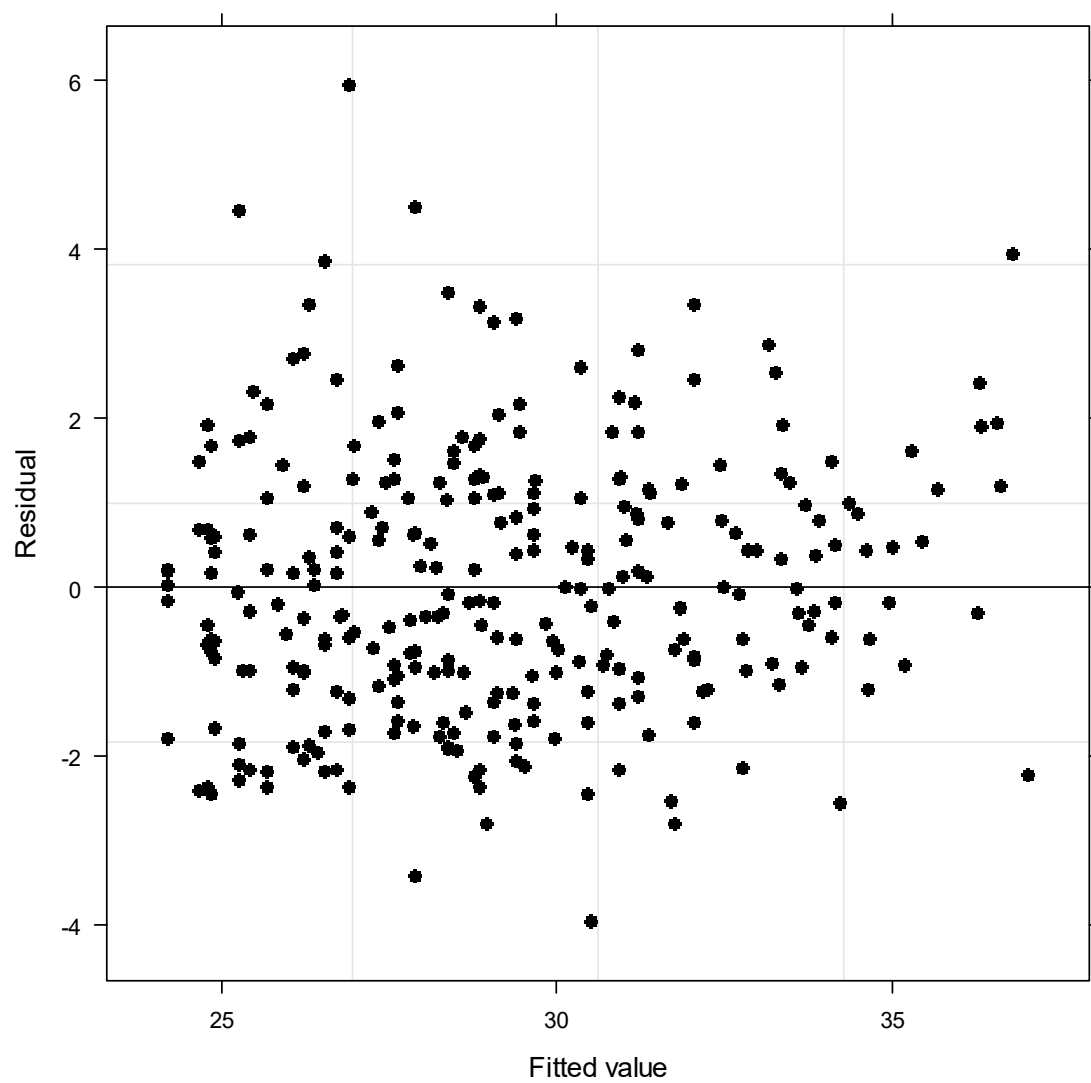

**Figure S6.** Plot of residuals against fitted values for Zn in teff.

## Analysis of variance

### *Variance component estimates*

(NB the year and site components are based on two levels only)

| Groups           | Variance |
|------------------|----------|
| Farmer.Site:Site | 5.237    |
| Site             | 1.226    |
| Year             | 5.196    |
| Residual         | 3.075    |

**Table S2.** ANOVA Table for Zn in teff.

|                   | Sum Sq  | Mean Sq | NumDF | DenDF  | F value | Pr(>F)    |     |
|-------------------|---------|---------|-------|--------|---------|-----------|-----|
| Landscape.unit    | 13.368  | 6.684   | 2     | 107.48 | 2.1734  | 0.11877   |     |
| C1                | 150.471 | 150.471 | 1     | 265.92 | 48.9265 | 2.151e-11 | *** |
| C2                | 14.539  | 14.539  | 1     | 265.18 | 4.7273  | 0.03057   | *   |
| C3                | 14.023  | 14.023  | 1     | 265.33 | 4.5597  | 0.03365   | *   |
| C4                | 4.252   | 4.252   | 1     | 265.68 | 1.3826  | 0.24071   |     |
| Landscape.unit:C1 | 11.070  | 5.535   | 2     | 264.59 | 1.7998  | 0.16735   |     |
| Landscape.unit:C2 | 2.668   | 1.334   | 2     | 263.91 | 0.4338  | 0.64850   |     |
| Landscape.unit:C3 | 2.025   | 1.012   | 2     | 264.44 | 0.3292  | 0.71982   |     |
| Landscape.unit:C4 | 10.102  | 5.051   | 2     | 265.70 | 1.6424  | 0.19547   |     |

## Wheat Se

Initial analysis shows that the grain Se data are strongly positively skew, and so are the residuals for a first fit of the model. Some outliers (upper and lower) appear in the residuals, but there is no evidence of outliers in the original data. Otherwise an assumption of normal and homogeneous residuals seemed plausible:

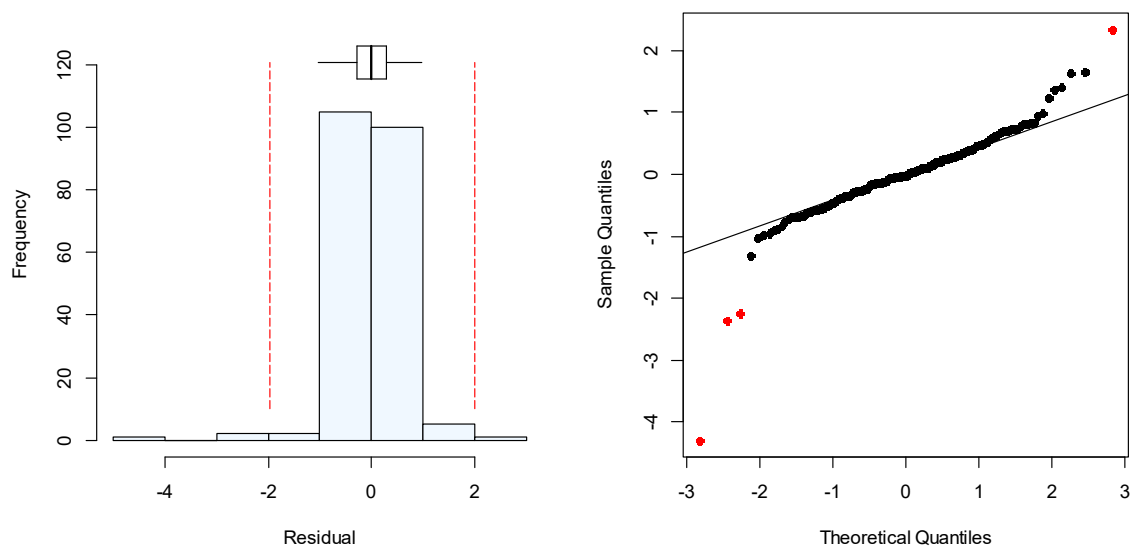

**Figure S7.** Wheat-Se summary statistics for the residuals from the initial fit.



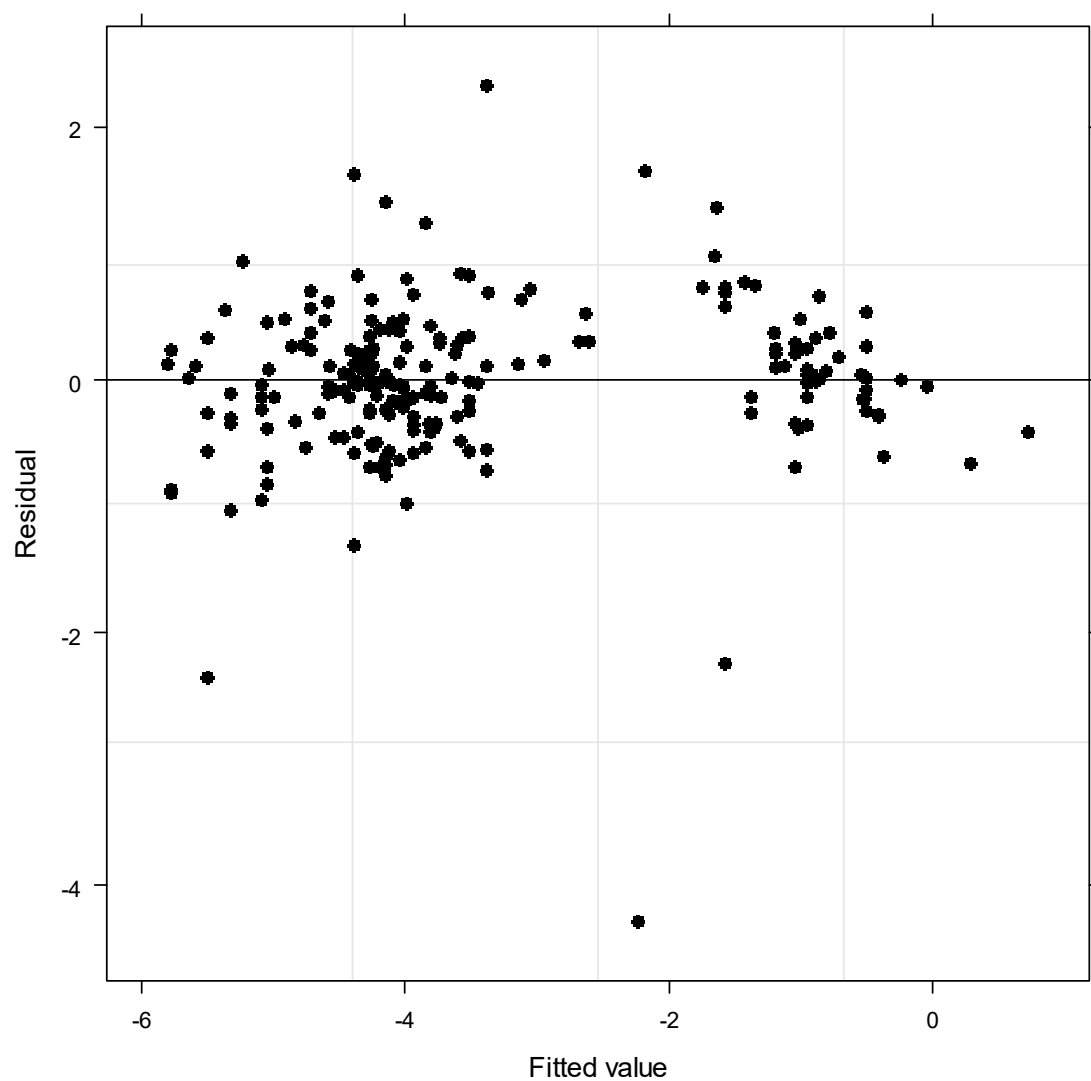

**Figure S8.** Plot of residuals against fitted values for Se in wheat.

| Mean  | Median | Q1    | Q3   | Var  | SD   | Skew  | Octile | skewness | Kurtosis | No. outliers |
|-------|--------|-------|------|------|------|-------|--------|----------|----------|--------------|
| 0.000 | -0.01  | -0.27 | 0.29 | 0.38 | 0.62 | -1.15 | 0.02   |          | 11.9     | 4            |

## Analysis of variance

*Variance component estimates*

(NB the year and site components are based on two levels only, log units)

| Groups           | Variance |
|------------------|----------|
| Farmer.Site:Site | 0.341    |
| Site             | 0.026    |
| Year             | 0.053    |
| Residual         | 0.487    |

**Table S3.** ANOVA Table for Se in wheat.

|                   | Sum Sq  | Mean Sq | NumDF | DenDF   | F value  | Pr(>F)    |
|-------------------|---------|---------|-------|---------|----------|-----------|
| Landscape.unit    | 5.468   | 2.734   | 2     | 49.913  | 5.6159   | 0.0063125 |
| C1                | 300.048 | 300.048 | 1     | 199.133 | 616.3718 | < 2.2e-16 |
| C2                | 1.051   | 1.051   | 1     | 199.361 | 2.1600   | 0.1432234 |
| C3                | 5.888   | 5.888   | 1     | 196.886 | 12.0949  | 0.0006222 |
| Landscape.unit:C1 | 0.430   | 0.215   | 2     | 198.678 | 0.4413   | 0.6438000 |
| Landscape.unit:C2 | 0.094   | 0.047   | 2     | 199.129 | 0.0970   | 0.9075643 |
| Landscape.unit:C3 | 0.415   | 0.208   | 2     | 195.939 | 0.4266   | 0.6533375 |

Teff Se

Initial analysis shows that the grain Se data are strongly positively skew, and so are the residuals for a first fit of the model. Some outliers (upper and lower) appear in the residuals, but there is no evidence of outliers in the original data. Otherwise an assumption of normal and homogeneous residuals seemed plausible:

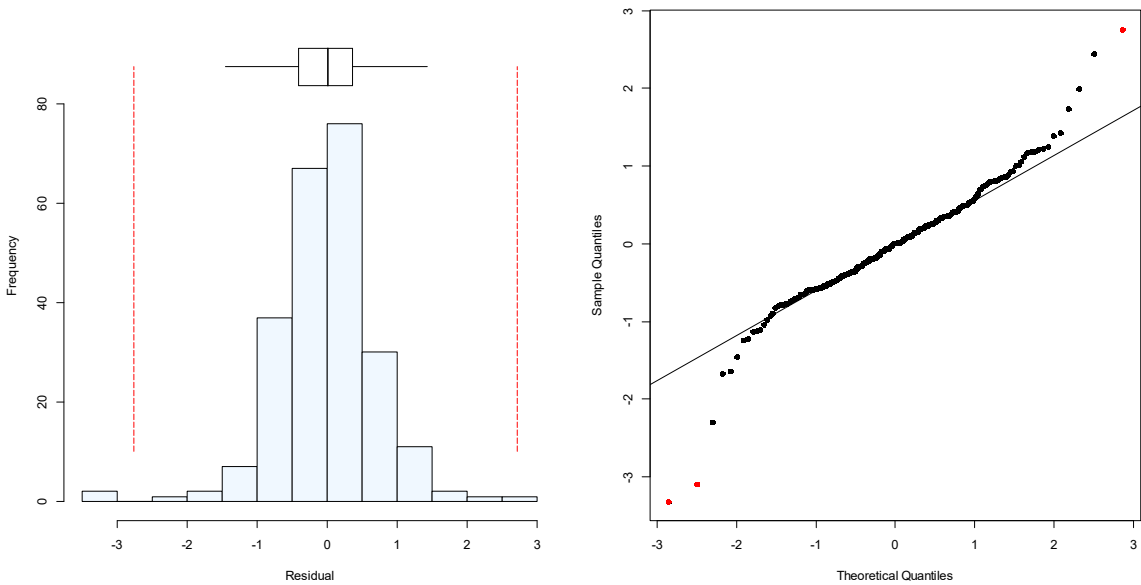

Figure S9. Teff-Se summary statistics for the residuals from the initial fit.

| Mean  | Median | Q1    | Q3   | Var  | SD   | Skew  | Octile | skewness | Kurtosis | No. outliers |
|-------|--------|-------|------|------|------|-------|--------|----------|----------|--------------|
| 0.000 | 0.01   | -0.41 | 0.37 | 0.52 | 0.72 | -0.33 | 0.08   |          | 3.8      | 3            |

Analysis of variance

Variance component estimates

(NB the year and site components are based on two levels only, log units)

| Groups           | Variance |
|------------------|----------|
| Farmer.Site:Site | 0.118    |
| Site             | 0.018    |
| Year             | 0.000    |

|          |       |
|----------|-------|
| Residual | 0.603 |
|----------|-------|

**Table S4.** ANOVA Table for Se in teff.

|                   | Sum Sq  | Mean Sq | NumDF | DenDF   | F value  | Pr(>F)    |
|-------------------|---------|---------|-------|---------|----------|-----------|
| Landscape.unit    | 12.196  | 6.098   | 2     | 60.142  | 10.1079  | 0.0001643 |
| C1                | 279.763 | 279.763 | 1     | 208.226 | 463.7194 | < 2.2e-16 |
| C2                | 0.788   | 0.788   | 1     | 213.607 | 1.3061   | 0.2543887 |
| C3                | 1.492   | 1.492   | 1     | 201.109 | 2.4732   | 0.1173766 |
| Landscape.unit:C1 | 9.417   | 4.709   | 2     | 204.508 | 7.8048   | 0.0005414 |
| Landscape.unit:C2 | 1.474   | 0.737   | 2     | 207.014 | 1.2218   | 0.2968238 |
| Landscape.unit:C3 | 0.983   | 0.492   | 2     | 201.143 | 0.8150   | 0.4441135 |
